# Supplementary material
Source: Elsevier journal article supplement (http://raiithold.iith.ac.in/1377/1/mmc1.pdf)

## Supporting Information

# Semi rigid imidazolium carboxylate controlled structural topologies in zwitterionic coordination polymers

Paladugu Suresh, Chatla Naga Babu and Ganesan Prabusankar\*

Department of Chemistry, Indian Institute of Technology Hyderabad, ODF Campus, Yeddumailaram, AP, INDIA-502 205. Fax: +91 40 2301 6032; Tel: +91 40 2301 6089; E-mail: prabu@iith.ac.in

**Figure S1.** FT-IR (neat) spectrum of compound **1**.

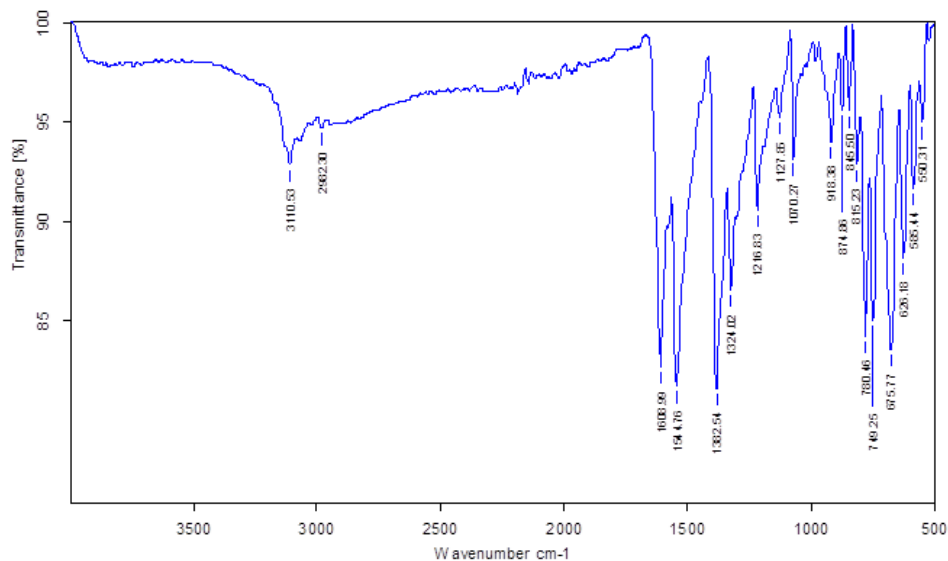

**Figure S2.** FT-IR (neat) spectrum of compound **2**.

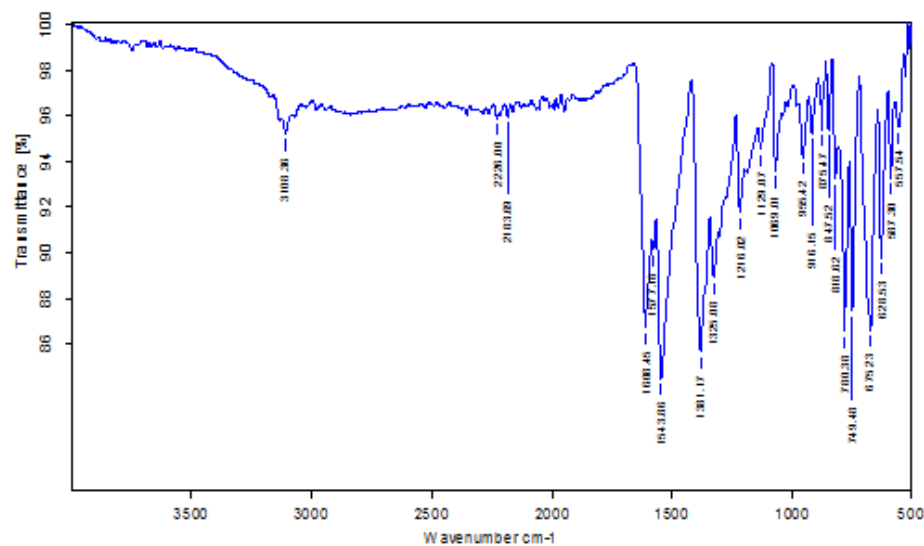

## Supporting Information

**Figure S3.** FT-IR (neat) spectrum of compound **3**.

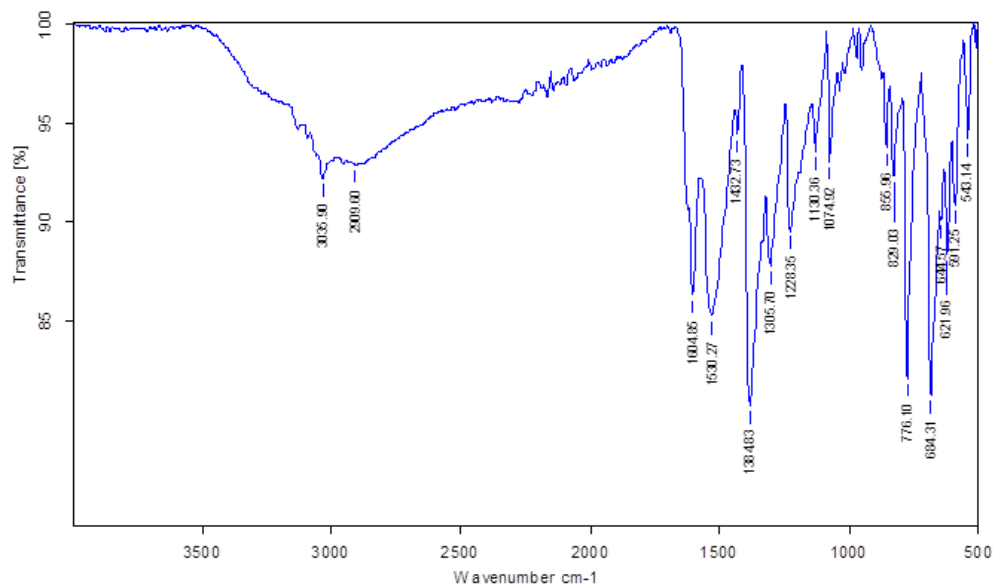

**Figure S4.** FT-IR (neat) spectrum of compound **4**.

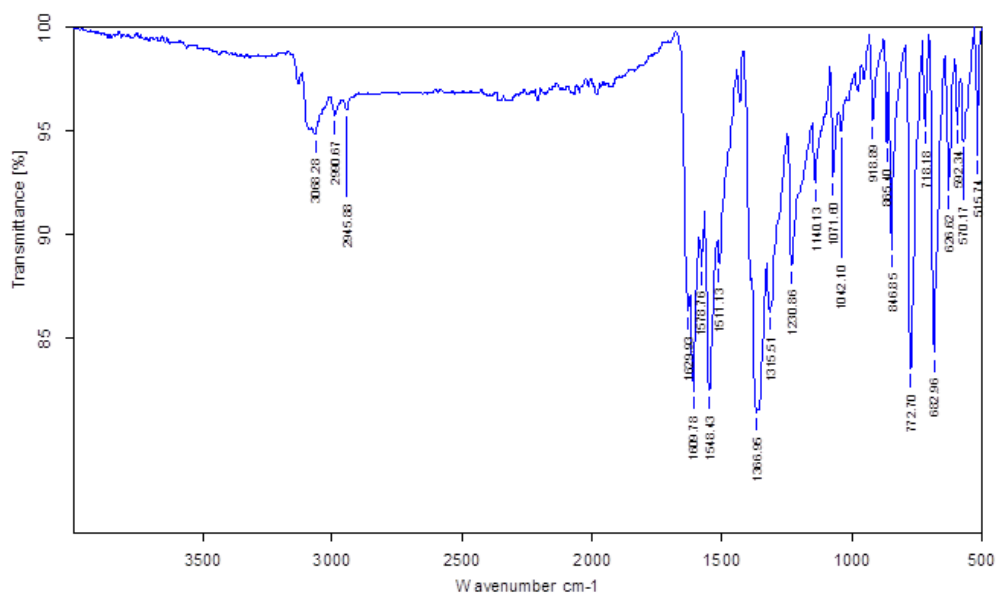

## Supporting Information

**Figure S5.** FT-IR (neat) spectrum of compound **5**.

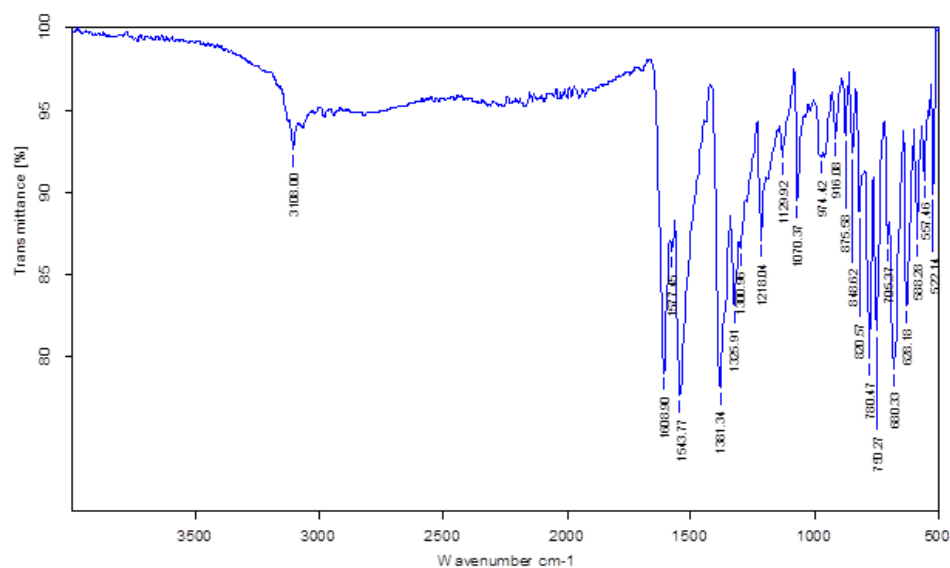

**Figure S6.** FT-IR (neat) spectrum of compound **6**.

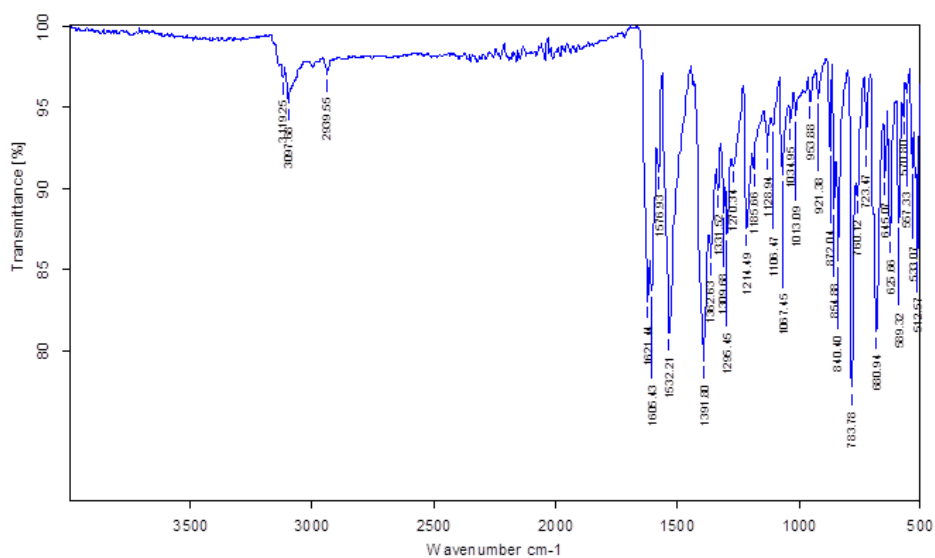

Supplement: mmc1 [file mmc1.pdf]
